# Supplementary material for: Changes of brain-derived neurotrophic factor (BDNF) levels after different exercise protocols: a systematic review of clinical studies in Parkinson’s disease
Source: PubMed Central journal article supplement (PMC10912511; doi:10.3389/fphys.2024.1352305), 2024-02-20
Supplement: DataSheet1.pdf [file DataSheet1.pdf]

# Changes of Brain-Derived Neurotrophic Factor (BDNF) levels after different exercise protocols: a systematic review of clinical studies in Parkinson's disease

## Supplementary File 1. Search strategies

### Pubmed

Search: ((Parkinson\*[Title/Abstract] OR PD[Title/Abstract]) AND (exercise[Title/Abstract] OR "physical activity"[Title/Abstract] OR training[Title/Abstract] OR sport\*[Title/Abstract] OR rehabilit\*[Title/Abstract] OR "physical therapy"[Title/Abstract] OR physiotherapy[Title/Abstract]) AND (BDNF[Title/Abstract] OR plastic\*[Title/Abstract] OR synap\*[Title/Abstract] OR neuro\*[Title/Abstract] OR cognit\*[Title/Abstract] OR biomarker\*[Title/Abstract])) NOT ((rat[Title] OR animal[Title] OR mouse[Title] OR mice[Title]) NOT review[Title]) Filters: from 2003/1/1 - 2022/12/31 Sort by: Most Recent

### Scopus

( TITLE ( ( parkinson\* OR pd ) AND ( exercise OR "physical activity" OR training OR sport\* OR rehabilit\* OR "physical therapy" OR physiotherapy ) AND ( bdnf OR plastic\* OR synap\* OR neuro\* OR cognit\* OR biomarker\* ) ) OR ABS ( ( parkinson\* OR pd ) AND ( exercise OR "physical activity" OR training OR sport\* OR rehabilit\* OR "physical therapy" OR physiotherapy ) AND ( bdnf OR plastic\* OR synap\* OR neuro\* OR cognit\* OR biomarker\* ) ) AND NOT TITLE ( ( rat OR animal OR mouse OR mice ) not AND review ) ) AND PUBYEAR > 2002 AND PUBYEAR < 2023

### Web of Science

(Parkinson\* OR PD) AND (exercise OR "physical activity" OR training OR sport\* OR rehabilit\* OR "physical therapy" OR physiotherapy) AND (BDNF OR plastic\* OR synap\* OR neuro\* OR cognit\* OR biomarker\*) (Title) or (Parkinson\* OR PD) AND (exercise OR "physical activity" OR training OR sport\* OR rehabilit\* OR "physical therapy" OR physiotherapy) AND (BDNF OR plastic\* OR synap\* OR neuro\* OR cognit\* OR biomarker\*) (Abstract) not (rat OR animal OR mouse OR mice) NOT review (Title)

### ClinicalTrial.gov

(Parkinson\* OR PD) AND (exercise OR "physical activity" OR training OR sport\* OR rehabilit\* OR "physical therapy" OR physiotherapy) AND (BDNF OR plastic\* OR synap\* OR neuro\* OR cognit\* OR biomarker\*) in Record Title OR (Parkinson\* OR PD) AND (exercise OR "physical activity" OR training OR sport\* OR rehabilit\* OR "physical therapy" OR physiotherapy) AND (BDNF OR plastic\* OR synap\* OR neuro\* OR cognit\* OR biomarker\*) in Abstract NOT (rat OR animal OR mouse OR mice) NOT review in Record Title - (Word variations have been searched)

### Embase

(Parkinson\* OR PD) AND (exercise OR "physical activity" OR training OR sport\* OR rehabilit\* OR "physical therapy" OR physiotherapy) AND (BDNF OR plastic\* OR synap\* OR neuro\* OR cognit\* OR biomarker\*) in Record Title OR (Parkinson\* OR PD) AND (exercise OR "physical activity" OR training OR sport\* OR rehabilit\* OR "physical therapy" OR physiotherapy) AND (BDNF OR plastic\* OR synap\* OR neuro\* OR cognit\* OR biomarker\*) in Abstract NOT (rat OR animal OR mouse OR mice) NOT review in Record Title - (Word variations have been searched)

### CINHAL

(Parkinson\* OR PD) AND (exercise OR "physical activity" OR training OR sport\* OR rehabilit\* OR "physical therapy" OR physiotherapy) AND (BDNF OR plastic\* OR synap\* OR neuro\* OR cognit\* OR biomarker\*) in Record Title OR (Parkinson\* OR PD) AND (exercise OR "physical activity" OR training OR sport\* OR rehabilit\* OR "physical therapy" OR physiotherapy) AND (BDNF OR plastic\* OR synap\* OR neuro\* OR cognit\* OR biomarker\*) in Abstract NOT (rat OR animal OR mouse OR mice) NOT review in Record Title - (Word variations have been searched)

**Supplementary File 2.** Measurement of BDNF by study

| <b>Author and year</b>        | <b>Sample</b> | <b>Unit</b> | <b>Timing of post-exercise BDNF measurement</b>                             |
|-------------------------------|---------------|-------------|-----------------------------------------------------------------------------|
| Angelucci et al. 2016         | Serum         | pg/mL       | At 8:00-9:00 a.m.                                                           |
| Da Silva Germanos et al. 2019 | Plasma        | pg/ml       | Not specified                                                               |
| De Oliveira et al. 2020       | Plasma        | ng/mg       | At 10-11 a.m.                                                               |
| Frazzitta et al. 2014         | Serum         | ng/mL       | At 7:00 am, away from exercise                                              |
| Freidle et al. 2022           | Serum         | pg/mL       | Within 2-3 weeks after the end of the intervention <sup>a</sup>             |
| Harro et al. 2022             | Serum         | ng/mL       | On a non-exercise day <sup>a</sup>                                          |
| Landers et al. 2019           | Plasma        | pg/mL       | Between 48 and 72 hours from active participation in the trial <sup>a</sup> |
| O'Callaghan et al. 2019       | Serum         | ng/ml       | Not specified                                                               |
| Pondé et al. 2019             | Serum         | pg/mL       | Not specified                                                               |
| Sajatovic et al. 2017         | Serum         | pg/mL       | Not specified                                                               |
| Schaeffer et al. 2022         | Serum         | ng/mL       | Away from the exercise <sup>a</sup>                                         |
| Segura et al. 2020            | Plasma        | pg/mL       | Not specified                                                               |
| Soke et al. 2021              | Serum         | pg/ml       | At 8-9 am, the day after the end of the intervention                        |
| Stuckenschneider et al. 2021  | Serum         | ng/mL       | Not on exercise days <sup>a</sup>                                           |
| Szymura et al. 2020           | Serum         | ng/mL       | At 8-10 a.m., 2 days after the completion of the programme                  |
| Zoladz et al. 2014            | Serum         | pg/mL       | One week after the end of the training <sup>a</sup>                         |

<sup>a</sup>Personal communication from the authors

**Supplementary File 3.** Studies not included in this review and reason for exclusion

| <b>Authors, year</b>           | <b>Reason for exclusion</b> |
|--------------------------------|-----------------------------|
| Angelucci et al., 2015 [1]     | Not physical training       |
| Angelucci et al., 2015 [1]     | Abstract (duplicate)        |
| Azevedo et al., 2022 [2]       | Observational study         |
| Bastioli et al., 2022 [3]      | Animals                     |
| Bekinschtein et al., 2020 [4]  | Review                      |
| Biagioni et al., 2018 [5]      | Abstract                    |
| Campos et al., 2016 [6]        | Review                      |
| Dias Belchior et al., 2017 [7] | Not BDNF measures           |
| Farshbaf et al., 2016 [8]      | Review                      |
| Farshbaf et al., 2016 [8]      | Review (duplicate)          |
| Ferreira et al., 2018 [9]      | Review                      |
| Fontanesi et al., 2016 [10]    | Not BDNF measures           |
| Franzén et al., 2018 [11]      | Protocol                    |
| Franzén et al., 2019 [12]      | Protocol                    |
| Goldberg et al., 2015 [13]     | Review                      |
| Harper et al., 2019 [14]       | Not BDNF measures           |
| Harpham et al., 2023 [15]      | Not BDNF measures           |
| Hirsch et al., 2016 [16]       | Review                      |
| Hooper et al., 2016 [17]       | Animals                     |
| HU et al., 2005 [18]           | Not physical training       |

|                                   |                                 |
|-----------------------------------|---------------------------------|
| Karim et al., 2022 [19]           | Measure of BDNF <12h (5-60 min) |
| Khalil et al., 2017 [20]          | Cross-sectional                 |
| Marusiak et al., 2015 [21]        | Not BDNF measures               |
| Mattson et al., 2004 [22]         | Animals                         |
| Migdadi et al., 2018 [23]         | Abstract                        |
| Monteiro-Junior et al., 2015 [24] | Review                          |
| Norwitz et al., 2020 [25]         | Not BDNF measures               |
| Pagnussat et al., 2018 [26]       | Not physical training           |
| Patterson et al., 2022 [27]       | Protocol                        |
| Radak et al., 2007 [28]           | Review                          |
| Rothman et al., 2012 [29]         | Review                          |
| Szymura et al., 2019 [30]         | Abstract                        |
| Tuon et al., 2014 [31]            | Animals                         |
| van Wegen et al., 2020 [32]       | Protocol                        |
| Wang et al., 2022 [33]            | Animals                         |
| Wu et al., 2011 [34]              | Animals                         |
| Yang et al., 2014 [35]            | Animals                         |

1. Angelucci, F., et al., *A pilot study on the effect of cognitive training on BDNF serum levels in individuals with Parkinson's disease*. *Front Hum Neurosci*, 2015. **9**: p. 130. <https://doi.org/10.3389/fnhum.2015.00130>
2. Azevedo, L.V.D., et al., *Acute exercise increases BDNF serum levels in patients with Parkinson's disease regardless of depression or fatigue*. *EUROPEAN JOURNAL OF SPORT SCIENCE*, 2022. **22**(8): p. 1296-1303. <https://doi.org/10.1080/17461391.2021.1922505>
3. Bastioli, G., et al., *Voluntary Exercise Boosts Striatal Dopamine Release: Evidence for the Necessary and Sufficient Role of BDNF*. *J Neurosci*, 2022. **42**(23): p. 4725-4736. <https://doi.org/10.1523/JNEUROSCI.2273-21.2022>
4. Miranda, M., et al., *Brain-Derived Neurotrophic Factor: A Key Molecule for Memory in the Healthy and the Pathological Brain*. *Front Cell Neurosci*, 2019. **13**: p. 363. <https://doi.org/10.3389/fncel.2019.00363>
5. Biagioni, M., et al. *Transcranial Magnetic Stimulation and Aerobic Exercise Increase BDNF-TrkB Signaling in Parkinson's Disease*. in *MOVEMENT DISORDERS*. 2018. WILEY 111 RIVER ST, HOBOKEN 07030-5774, NJ USA.

6. Campos, C., et al., *Exercise-induced neuroprotective effects on neurodegenerative diseases: the key role of trophic factors*. *Expert Rev Neurother*, 2016. **16**(6): p. 723-34. <https://doi.org/10.1080/14737175.2016.1179582>
7. Belchior, L.D., et al., *Treadmill in Parkinson's: influence on gait, balance, BDNF and Reduced Glutathione*. *Fisioterapia em Movimento*, 2017. **30**: p. 93-100. <https://doi.org/10.1590/1980-5918.030.S01.AO09>
8. Farshbaf, M.J., et al., *Does PG1 alpha/FNDC5/BDNF Elicit the Beneficial Effects of Exercise on Neurodegenerative Disorders?* *NEUROMOLECULAR MEDICINE*, 2016. **18**(1): p. 1-15. <https://doi.org/10.1007/s12017-015-8370-x>
9. Ferreira, R.N., et al., *Neurotrophic Factors in Parkinson's Disease: What Have we Learned from Pre-Clinical and Clinical Studies?* *Curr Med Chem*, 2018. **25**(31): p. 3682-3702. <https://doi.org/10.2174/0929867325666180313101536>
10. Fontanesi, C., et al., *Intensive Rehabilitation Enhances Lymphocyte BDNF-TrkB Signaling in Patients With Parkinson's Disease*. *Neurorehabil Neural Repair*, 2016. **30**(5): p. 411-8. <https://doi.org/10.1177/1545968315600272>
11. Franzen, E., et al. *Linking neuroplastic effects to behavioral changes after balance training in Parkinson's disease: a study protocol of a randomized controlled trial*. in *MOVEMENT DISORDERS*. 2018. WILEY 111 RIVER ST, HOBOKEN 07030-5774, NJ USA. <https://www.mdsabstracts.org/abstract/linking-neuroplastic-effects-to-behavioral-changes-after-balance-training-in-parkinsons-disease-a-study-protocol-of-a-randomized-controlled-trial/>
12. Franzén, E., et al., *The EXPANd trial: effects of exercise and exploring neuroplastic changes in people with Parkinson's disease: a study protocol for a double-blinded randomized controlled trial*. *BMC Neurol*, 2019. **19**(1): p. 280. <https://doi.org/10.1186/s12883-019-1520-2>
13. Goldberg, A., C.L. Curtis, and J.A. Kleim, *Linking Genes to Neurological Clinical Practice: The Genomic Basis for Neurorehabilitation*. *JOURNAL OF NEUROLOGIC PHYSICAL THERAPY*, 2015. **39**(1): p. 52-61. <https://doi.org/10.1097/npt.0000000000000066>
14. Harper, S.A., et al., *Non-Motor Symptoms after One Week of High Cadence Cycling in Parkinson's Disease*. *Int J Environ Res Public Health*, 2019. **16**(12). <https://doi.org/10.3390/ijerph16122104>
15. Harpham, C., et al., *Co-Creating a Feasible, Acceptable and Safe Home-Based High-Intensity Interval Training Programme for People with Parkinson's: The HIIT- Home4Parkinson's Study*. *Int J Environ Res Public Health*, 2023. **20**(9). <https://doi.org/10.3390/ijerph20095671>
16. Hirsch, M.A., S.S. Iyer, and M. Sanjak, *Exercise-induced neuroplasticity in human Parkinson's disease: What is the evidence telling us?* *PARKINSONISM & RELATED DISORDERS*, 2016. **22**: p. S78-S81. <https://doi.org/10.1016/j.parkreldis.2015.09.030>
17. Hooper, P.L., et al., *The central role of heat shock factor 1 in synaptic fidelity and memory consolidation*. *Cell Stress Chaperones*, 2016. **21**(5): p. 745-53. <https://doi.org/10.1007/s12192-016-0709-1>
18. Hu, D., et al., *Genetic polymorphisms of brain-derived neurotrophic factor and sporadic Parkinson disease*. *Chinese Journal of Clinical Rehabilitation*, 2005. **9**(17): p. 196-197. <https://pesquisa.bvsalud.org/portal/resource/pt/wpr-409402>
19. Karim, A., et al., *Evaluation of Sarcopenia Using Biomarkers of the Neuromuscular Junction in Parkinson's Disease*. *J Mol Neurosci*, 2022. **72**(4): p. 820-829. <https://doi.org/10.1007/s12031-022-01970-7>
20. Khalil, H., et al., *The Association Between Physical Activity With Cognitive Function and Brain-Derived Neurotrophic Factor in People With Parkinson's Disease: A Pilot Study*. *J Aging Phys Act*, 2017. **25**(4): p. 646-652. <https://doi.org/10.1123/japa.2016-0121>
21. Marusiak, J., et al., *INTERVAL TRAINING-INDUCED ALLEVIATION OF RIGIDITY AND HYPERTONIA IN PATIENTS WITH PARKINSON'S DISEASE IS ACCOMPANIED BY INCREASED BASAL SERUM BRAIN-DERIVED NEUROTROPHIC FACTOR A repeated-measures, case series pilot study*. *JOURNAL OF REHABILITATION MEDICINE*, 2015. **47**(4): p. 372-375. <https://doi.org/10.2340/16501977-1931>
22. Mattson, M.P., et al., *Prophylactic Activation of Neuroprotective Stress Response Pathways by Dietary and Behavioral Manipulations*. *NeuroRx*, 2004. **1**(1): p. 111-116. <https://doi.org/10.1602/neurorx.1.1.111>
23. Migdadi, H., et al., *Modulating BDNF Activity in Parkinson's Disease: the Impact of Aerobic Exercise and Transcranial Magnetic Stimulation (P5. 076)*. 2018, AAN Enterprises. <https://www.aan.com/MSA/Public/events/AbstractDetails/38628>
24. Monteiro-Junior, R.S., et al., *We need to move more: Neurobiological hypotheses of physical exercise as a treatment for Parkinson's disease*. *Med Hypotheses*, 2015. **85**(5): p. 537-41. <https://doi.org/10.1016/j.mehy.2015.07.011>
25. Norwitz, N.G., et al., *A Ketone Ester Drink Enhances Endurance Exercise Performance in Parkinson's Disease*. *Front Neurosci*, 2020. **14**: p. 584130. <https://doi.org/10.3389/fnins.2020.584130>

26. Pagnussat, A.S., et al., *Plantar stimulation in parkinsonians: From biomarkers to mobility - randomized-controlled trial*. Restor Neurol Neurosci, 2018. **36**(2): p. 195-205. <https://doi.org/10.3233/rnn-170744>
27. Patterson, C.G., et al., *Study in Parkinson's disease of exercise phase 3 (SPARX3): study protocol for a randomized controlled trial*. Trials, 2022. **23**(1): p. 855. <https://doi.org/10.1186/s13063-022-06703-0>
28. Radak, Z., et al., *Effects of exercise on brain function: role of free radicals*. APPLIED PHYSIOLOGY NUTRITION AND METABOLISM-PHYSIOLOGIE APPLIQUEE NUTRITION ET METABOLISME, 2007. **32**(5): p. 942-947. <https://doi.org/10.1139/h07-081>
29. Rothman, S.M., et al., *Brain-derived neurotrophic factor as a regulator of systemic and brain energy metabolism and cardiovascular health*, in *BRAIN AND OBESITY*, G. Cizza and K.I. Rother, Editors. 2012. p. 49-63. <https://doi.org/10.1111/j.1749-6632.2012.06525.x>
30. *Abstract book of the 5th World Parkinson Congress, Kyoto, Japan, June 4–7, 2019*. Journal of Parkinson's Disease, 2019. **9**: p. 1-278. <https://content.iospress.com/download/journal-of-parkinsons-disease/jpd199900?id=journal-of-parkinsons-disease%2Fjpd199900>
31. Tuon, T., et al., *Physical training prevents depressive symptoms and a decrease in brain-derived neurotrophic factor in Parkinson's disease*. Brain Res Bull, 2014. **108**: p. 106-12. <https://doi.org/10.1016/j.brainresbull.2014.09.006>
32. van Wegen, E.E.H., et al., *High-Intensity Interval Cycle Ergometer Training in Parkinson's Disease: Protocol for Identifying Individual Response Patterns Using a Single-Subject Research Design*. Front Neurol, 2020. **11**: p. 569880. <https://doi.org/10.3389/fneur.2020.569880>
33. Wang, T.F., et al., *Inhibition of Nigral Microglial Activation Reduces Age-Related Loss of Dopaminergic Neurons and Motor Deficits*. Cells, 2022. **11**(3). <https://doi.org/10.3390/cells11030481>
34. Wu, S.Y., et al., *Running exercise protects the substantia nigra dopaminergic neurons against inflammation-induced degeneration via the activation of BDNF signaling pathway*. Brain Behav Immun, 2011. **25**(1): p. 135-46. <https://doi.org/10.1016/j.bbi.2010.09.006>
35. Yang, J.L., et al., *BDNF and exercise enhance neuronal DNA repair by stimulating CREB-mediated production of apurinic/apyrimidinic endonuclease 1*. Neuromolecular Med, 2014. **16**(1): p. 161-174. <https://doi.org/10.1007/s12017-013-8270-x>

**Supplementary File 4.** Type, intensity, frequency and duration of exercise components by study arm

| Author and year               | Study arm <sup>a</sup> | Activity                                                                                              | Type of activity | MET | Sessions week | Min session |
|-------------------------------|------------------------|-------------------------------------------------------------------------------------------------------|------------------|-----|---------------|-------------|
| Angelucci et al. 2016         | Multimodal             | Relaxation, breathing                                                                                 | Others           | 1.5 | 5             | 10          |
|                               |                        | Flexibility                                                                                           | Others           | 2.0 | 5             | 15          |
|                               |                        | Mobility                                                                                              | Others           | 2.3 | 5             | 20          |
|                               |                        | Postural                                                                                              | Others           | 2.5 | 5             | 20          |
|                               |                        | Treadmill                                                                                             | Aerobic          | 3.0 | 5             | 20          |
|                               |                        | Stationary bike                                                                                       | Aerobic          | 3.0 | 5             | 20          |
|                               |                        | Wii Fit Balance Board                                                                                 | Balance          | 2.3 | 5             | 20          |
|                               |                        | Coordination                                                                                          | Others           | 2.5 | 5             | 25          |
| Da Silva Germanos et al. 2019 | Multimodal             | Aquatic exercises: stretching, mobility                                                               | Others           | 2.5 | 2             | 10          |
|                               |                        | Aquatic exercises: strengthening, gait, balance, proprioception                                       | Resistance       | 5.0 | 2             | 20          |
|                               |                        | Aquatic exercises: dual task                                                                          | Aerobic          | 3.0 | 2             | 20          |
| De Oliveira et al. 2020       | Multimodal             | Mobility, coordination                                                                                | Others           | 2.5 | 2             | 8           |
|                               |                        | Deep water running (endurance)                                                                        | Aerobic          | 5.0 | 2             | 35          |
|                               |                        | Coordination                                                                                          | Balance          | 3.0 | 2             | 13          |
|                               |                        | Stretching, relaxation                                                                                | Others           | 2.0 | 2             | 8           |
| Frazzitta et al. 2014         | Multimodal             | Cardiovascular exercises                                                                              | Aerobic          | 2.5 | 5             | 15          |
|                               |                        | Stretching, mobility                                                                                  | Others           | 2.3 | 5             | 15          |
|                               |                        | Postural                                                                                              | Others           | 2.5 | 5             | 15          |
|                               |                        | Stabilometric platform with a visual cue                                                              | Balance          | 2.5 | 5             | 15          |
|                               |                        | Treadmill training with both a visual and an auditory cue                                             | Aerobic          | 2.8 | 5             | 30          |
|                               |                        | Occupational therapy                                                                                  | Others           | 2.0 | 5             | 40          |
| Freidle et al. 2022           | Multimodal             | HiBalance: sensory integration, motor agility, anticipatory postural adjustments and stability limits | Balance          | 3.0 | 2             | 50          |

|                         |                             |                                                                                                        |            |     |   |    |
|-------------------------|-----------------------------|--------------------------------------------------------------------------------------------------------|------------|-----|---|----|
|                         |                             | Functional aerobic (home exercises)                                                                    | Aerobic    | 3.5 | 1 | 20 |
|                         |                             | Strength exercises (home exercises)                                                                    | Resistance | 3.5 | 1 | 20 |
|                         | Speech and communication    | HiCommunication: voice sound level, articulatory precision, word retrieval, memory                     | Others     | 1.3 | 2 | 50 |
|                         |                             | Voice, speech function (home exercises)                                                                | Others     | 1.3 | 1 | 30 |
| Harro et al. 2022       | Endurance                   | Warm up (nordic walking)                                                                               | Aerobic    | 2.5 | 2 | 10 |
|                         |                             | Nordic walking                                                                                         | Aerobic    | 5.0 | 2 | 43 |
|                         |                             | Cool down (nordic walking)                                                                             | Aerobic    | 2.5 | 2 | 10 |
| Landers et al. 2019     | Multimodal (High intensity) | Treadmill, overground walking on the indoor track, stair climber, bike, recumbent bike, rowing machine | Aerobic    | 4.5 | 4 | 30 |
|                         |                             | Strengthening the major muscle groups of the trunk and upper/lower extremities                         | Resistance | 4.5 | 4 | 30 |
|                         |                             | Postural, dynamic gait, sensory orientation                                                            | Balance    | 3.0 | 4 | 15 |
|                         |                             | Stretching                                                                                             | Others     | 2.3 | 4 | 15 |
|                         |                             | Home exercise (same exercises)                                                                         | Aerobic    | 4.0 | 2 | 18 |
|                         |                             | Home exercise (same exercises)                                                                         | Resistance | 4.0 | 2 | 18 |
|                         |                             | Home exercise (same exercises)                                                                         | Balance    | 3.0 | 2 | 9  |
|                         |                             | Home exercise (same exercises)                                                                         | Others     | 2.3 | 2 | 9  |
|                         | Multimodal (Low intensity)  | Treadmill, overground walking on the indoor track, stair climber, bike, recumbent bike, rowing machine | Aerobic    | 2.7 | 4 | 15 |
|                         |                             | Strengthening the major muscle groups of the trunk and upper/lower extremities                         | Resistance | 3.0 | 4 | 15 |
|                         |                             | Step touch task                                                                                        | Balance    | 2.5 | 4 | 10 |
|                         |                             | Stretching                                                                                             | Others     | 2.3 | 4 | 10 |
|                         |                             | Home exercise (same exercises)                                                                         | Aerobic    | 3.0 | 2 | 11 |
|                         |                             | Home exercise (same exercises)                                                                         | Resistance | 3.0 | 2 | 11 |
|                         |                             | Home exercise (same exercises)                                                                         | Balance    | 2.5 | 2 | 8  |
|                         |                             | Home exercise (same exercises)                                                                         | Others     | 2.3 | 2 | 8  |
| O'Callaghan et al. 2019 | Aerobic + Resistance        | Warm up                                                                                                | Aerobic    | 2.5 | 3 | 8  |



|                       |                                     |                                                                                            |            |     |   |    |
|-----------------------|-------------------------------------|--------------------------------------------------------------------------------------------|------------|-----|---|----|
|                       |                                     | Stretching                                                                                 | Others     | 2.3 | 3 | 2  |
|                       |                                     | 12 stations in a circuit                                                                   | Aerobic    | 4.0 | 3 | 27 |
|                       |                                     | Resistance stations                                                                        | Resistance | 4.0 | 3 | 12 |
|                       |                                     | Cool down                                                                                  | Aerobic    | 2.5 | 3 | 8  |
|                       |                                     | Stretching                                                                                 | Others     | 2.3 | 3 | 2  |
|                       | High-Intensity Interval Training    | Warm up                                                                                    | Resistance | 3.0 | 3 | 10 |
|                       |                                     | Power clean and press, step and press, squat, pull-down to squat, high pull, bent over row | Resistance | 7.0 | 3 | 20 |
|                       |                                     | Cool down                                                                                  | Resistance | 3.0 | 3 | 5  |
| Pondé et al. 2019     | Aerobic                             | Treadmill                                                                                  | Aerobic    | 3.0 | 2 | 40 |
|                       |                                     | Motor imagery                                                                              | Others     | 1.1 | 2 | 14 |
| Sajatovic et al. 2017 | Aerobic + Resistance (peer support) | Warm up                                                                                    | Aerobic    | 2.5 | 3 | 5  |
|                       |                                     | EXCEED: fast-paced, low-resistance cycling                                                 | Aerobic    | 4.0 | 3 | 20 |
|                       |                                     | EXCEED: progressive sequence of resistance bands                                           | Resistance | 3.5 | 3 | 20 |
|                       |                                     | Cool down                                                                                  | Aerobic    | 2.5 | 3 | 5  |
|                       | Aerobic + Resistance                | Warm up                                                                                    | Aerobic    | 2.5 | 3 | 5  |
|                       |                                     | SGE: fast-paced, low-resistance cycling                                                    | Aerobic    | 4.0 | 3 | 20 |
|                       |                                     | SGE: progressive sequence of resistance bands                                              | Resistance | 3.5 | 3 | 20 |
|                       |                                     | Cool down                                                                                  | Aerobic    | 2.5 | 3 | 5  |
| Schaeffer et al. 2022 | Aerobic                             | Exergaming                                                                                 | Aerobic    | 4.0 | 3 | 45 |
| Segura et al. 2020    | Aerobic                             | Warm up                                                                                    | Aerobic    | 2.5 | 3 | 10 |
|                       |                                     | Stationary tandem bicycle                                                                  | Aerobic    | 6.0 | 3 | 20 |
|                       |                                     | Cool down                                                                                  | Aerobic    | 2.5 | 3 | 5  |
|                       |                                     | Stretching                                                                                 | Others     | 2.3 | 3 | 10 |
| Soke et al. 2021      | Aerobic + Resistance                | Warm up                                                                                    | Aerobic    | 2.5 | 3 | 5  |

|                              |            |                                                                                  |            |     |   |    |
|------------------------------|------------|----------------------------------------------------------------------------------|------------|-----|---|----|
|                              |            | Treadmill                                                                        | Aerobic    | 4.5 | 3 | 20 |
|                              |            | Cool down                                                                        | Aerobic    | 2.5 | 3 | 5  |
|                              |            | Task-oriented training (TOT): circuit with a series of workstations              | Resistance | 4.0 | 3 | 33 |
|                              | Aerobic    | Warm up                                                                          | Aerobic    | 2.5 | 3 | 5  |
|                              |            | Treadmill                                                                        | Aerobic    | 4.5 | 3 | 20 |
|                              |            | Cool down                                                                        | Aerobic    | 2.5 | 3 | 5  |
| Stuckenschneider et al. 2021 | Multimodal | Coordination                                                                     | Balance    | 2.5 | 2 | 20 |
|                              |            | Wall pushups, holding medicine balls with outstretched arms, squats, or crunches | Resistance | 4.1 | 2 | 20 |
|                              |            | Walking or running exercises                                                     | Aerobic    | 4.1 | 2 | 20 |
| Szymura et al. 2020          | Aerobic    | Warm up                                                                          | Aerobic    | 2.5 | 3 | 5  |
|                              |            | Wii Fit Balance Board                                                            | Balance    | 3.3 | 3 | 50 |
|                              |            | Cool down                                                                        | Aerobic    | 2.5 | 3 | 5  |
| Zoladz et al. 2014           | Aerobic    | Warm up                                                                          | Aerobic    | 2.5 | 3 | 10 |
|                              |            | Interval training                                                                | Aerobic    | 3.5 | 3 | 40 |
|                              |            | Cool down                                                                        | Aerobic    | 2.5 | 3 | 10 |

<sup>a</sup>Definition of exercise intervention according Zhou B et al. in Aging Neurosci 2022  
Abbreviations: MET, Metabolic Equivalent of Task.

**Supplementary File 5.** Pre-post exercise BDNF levels of experimental and comparison group in controlled studies only

| Author and year         | Study arm <sup>a</sup>              | BDNF before the exercise <sup>b</sup> | BDNF after the exercise <sup>b</sup> | SMD <sup>c</sup> | (95% CI)     |
|-------------------------|-------------------------------------|---------------------------------------|--------------------------------------|------------------|--------------|
| Frazzitta et al. 2014   | Multimodal                          | 21.6 (3.4)                            | 24.8 (6.4)                           | 0.64             | (-0.16 1.45) |
|                         | Control                             | 22.9 (4.0)                            | 22.6 (4.3)                           |                  |              |
| Freidle et al. 2022     | Multimodal                          | 38010.8 (7956.7)                      | 37169.4 (5928.3)                     | 0.14             | (-0.26 0.54) |
|                         | Speech and communication            | 37805.3 (8044.6)                      | 35945.8 (6208.5)                     |                  |              |
| Landers et al. 2019     | Multimodal (high intensity)         | 1960.2 (1529.5)                       | 2580.7 (1411.2)                      | -0.07            | (-0.85 0.70) |
|                         | Multimodal (low intensity)          | 960.3 (1482.9)                        | 1697.5 (1368.1)                      |                  |              |
| O'Callaghan et al. 2019 | Aerobic + Resistance                | 1300.1                                | 1338.0                               | 0.32             | (-0.42 1.06) |
|                         | Control                             | 1470.3                                | 861.4                                |                  |              |
|                         | High-Intensity Interval Training    | 685.0                                 | 783.9                                |                  |              |
|                         | Control                             | 699.9                                 | 627.9                                |                  |              |
| Sajatovic et al. 2017   | Aerobic + Resistance (peer support) |                                       |                                      | 0.54             | (-0.24 1.32) |
|                         | Aerobic + Resistance                |                                       |                                      |                  |              |
| Segura et al. 2020      | Aerobic                             | 20.6 (120.0)                          | 207.1 (120.0)                        | 1.85             | (0.61 3.09)  |
|                         | Control                             | 260.0 (150.0)                         | 149.6 (150.0)                        |                  |              |
| Soke et al. 2021        | Aerobic + Resistance                | 1397.0                                | 1507.5                               | 0.03             | (-0.68 0.74) |
|                         | Aerobic                             | 1487.6                                | 1411.2                               |                  |              |
| Szymura et al. 2020     | Aerobic                             | 21.2 (8.4)                            | 30.4 (6.3)                           | 1.45             | (0.64 2.25)  |
|                         | Control                             | 30.1 (8.0)                            | 25.8 (11.7)                          |                  |              |

<sup>a</sup>Definition of exercise intervention according Zhou B et al. in Aging Neurosci 2022; <sup>b</sup>Mean (Standard deviation). For O'Callaghan et al. 2019, Soke et al. 2021 the median is reported; <sup>c</sup>Standardized Mean Difference (Hedges' g); for the studies by O'Callaghan et al. 2019, Sajatovic et al. 2017, Soke et al. 2021 data was derived from Jiecheng et al. 2023

**Supplementary File 6.** Pre-post exercise BDNF levels separately by study arm in controlled and non-controlled studies

| Author and year               | Study arm <sup>a</sup>              | BDNF before the exercise <sup>b</sup> | BDNF after the exercise <sup>b</sup> | SMD <sup>c</sup> | (95% CI)     |
|-------------------------------|-------------------------------------|---------------------------------------|--------------------------------------|------------------|--------------|
| Angelucci et al. 2016         | Multimodal                          | 2188.4 (1718.8)                       | 2356.5 (1666.7)                      | 0.10             | (-0.83 1.02) |
| Da Silva Germanos et al. 2019 | Multimodal                          | 493.9                                 | 933.3                                | -                |              |
| De Oliveira et al. 2020       | Multimodal                          | 0.2 (0.1)                             | 0.4 (0.3)                            | 1.00             | (0.02 1.98)  |
| Frazzitta et al. 2014         | Multimodal                          | 21.6 (3.4)                            | 24.8 (6.4)                           | 0.61             | (-0.15 1.37) |
|                               | Control                             | 22.9 (4.0)                            | 22.6 (4.3)                           | -0.07            | (-0.95 0.81) |
| Freidle et al. 2022           | Multimodal                          | 38010.8 (7956.7)                      | 37169.4 (5928.3)                     | -0.12            | (-0.52 0.28) |
|                               | Speech and communication            | 37805.3 (8044.6)                      | 35945.8 (6208.5)                     | -0.26            | (-0.66 0.15) |
| Harro et al. 2022             | Endurance                           | 34.8                                  | 32.3                                 | -                |              |
| Landers et al. 2019           | Multimodal (high intensity)         | 1960.2 (1529.5)                       | 2580.7 (1411.2)                      | 0.42             | (-0.36 1.20) |
|                               | Multimodal (low intensity)          | 960.3 (1482.9)                        | 1697.5 (1368.1)                      | 0.52             | (-0.33 1.37) |
| O'Callaghan et al. 2019       | Aerobic + Resistance                | 1300.1                                | 1338.0                               | -                |              |
|                               | Control                             | 1470.3                                | 861.4                                | -                |              |
|                               | High-Intensity Interval Training    | 685.0                                 | 783.9                                | -                |              |
|                               | Control                             | 699.9                                 | 627.9                                | -                |              |
| Pondé et al. 2019             | Aerobic                             | 88.8 (111.8)                          | 202.6 (183.4)                        | 0.75             | (-0.26 1.76) |
| Sajatovic et al. 2017         | Aerobic + Resistance (peer support) | 26.8 (15.6)                           | 90.0 (166.4)                         | 0.53             | (-0.25 1.32) |
|                               | Aerobic + Resistance                | 26.8 (15.6)                           | 90.0 (166.4)                         | 0.53             | (-0.19 1.26) |
| Schaeffer et al. 2022         | Aerobic                             | 23.9 (7.5)                            | 25.2 (7.3)                           | 0.18             | (-0.50 0.85) |
| Segura et al. 2020            | Aerobic                             | 20.6 (120.0)                          | 207.1 (120.0)                        | 1.55             | (0.26 2.85)  |
|                               | Control                             | 260.0 (150.0)                         | 149.6 (150.0)                        | -0.74            | (-1.82 0.35) |
| Soke et al. 2021              | Aerobic + Resistance                | 1397.0                                | 1507.5                               | -                |              |
|                               | Aerobic                             | 1487.6                                | 1411.2                               | -                |              |
| Stuckenschneider et al. 2021  | Multimodal                          | 33.6 (9.7)                            | 34.3 (11.8)                          | 0.07             | (-0.91 1.05) |
| Szymura et al. 2020           | Aerobic                             | 21.2 (8.4)                            | 30.4 (6.3)                           | 1.24             | (0.48 1.99)  |
|                               | Control                             | 30.1 (8.0)                            | 25.8 (11.7)                          | -0.43            | (-1.21 0.35) |

<sup>a</sup>Definition of exercise intervention according Zhou B et al. in Aging Neurosci 2022; <sup>b</sup>Mean (Standard deviation). For the studies by Da Silva Germanos et al. 2019, Harro et al. 2022, O'Callaghan et al. 2019, Soke et al. 2021 the median is reported. <sup>c</sup>Standardized Mean Difference (Cohen's d)

### Supplementary File 7. Sensitivity analysis

Meta-regression of between-group differences in intensity, volume and type of exercise on changes in BDNF levels (controlled studies only)

|                                         | 5 studies   |              |         | 9 studies   |              |         |
|-----------------------------------------|-------------|--------------|---------|-------------|--------------|---------|
|                                         | Coefficient | (95% CI)     | P value | Coefficient | (95% CI)     | P value |
| <b>Δ Time-weighted average of MET</b>   | 0.41        | (0.02 0.81)  | 0.042   | 0.14        | (-0.04 0.32) | 0.124   |
| <b>Δ Total MET-hours (x100)</b>         | -0.26       | (-2.23 1.71) | 0.797   | -0.04       | (-0.94 0.87) | 0.934   |
| <b>Type</b>                             |             |              |         |             |              |         |
| <b>Identical (Aerobic + Resistance)</b> | Reference   |              |         | Reference   |              |         |
| <b>Aerobic</b>                          | 1.25        | (-0.93 3.43) | 0.262   | 0.58        | (-0.64 1.79) | 0.350   |
| <b>Balance</b>                          | 0.81        | (-1.29 2.91) | 0.449   | 0.45        | (-0.80 1.70) | 0.476   |
| <b>Resistance</b>                       |             |              |         | 0.00        | (-1.31 1.31) | 0.999   |

Linear regression of intensity, volume and type of exercise on change in BDNF (study arms of controlled and non-controlled studies)

|                                     | Coefficient | (95% CI)     | P value |
|-------------------------------------|-------------|--------------|---------|
| <b>Time-weighted average of MET</b> | 0.26        | (0.15 0.38)  | 0.000   |
| <b>Total MET-hours (x100)</b>       | 0.52        | (-0.02 1.06) | 0.059   |
| <b>Type</b>                         |             |              |         |
| <b>Aerobic</b>                      | 1.10        | (0.50 1.70)  | 0.002   |
| <b>Balance</b>                      | 0.93        | (0.10 1.77)  | 0.031   |
| <b>Aerobic + Resistance</b>         | 0.79        | (0.14 1.43)  | 0.020   |

**Supplementary File 8.** Risk of bias assessment using Cochrane risk of bias tool (RoB)

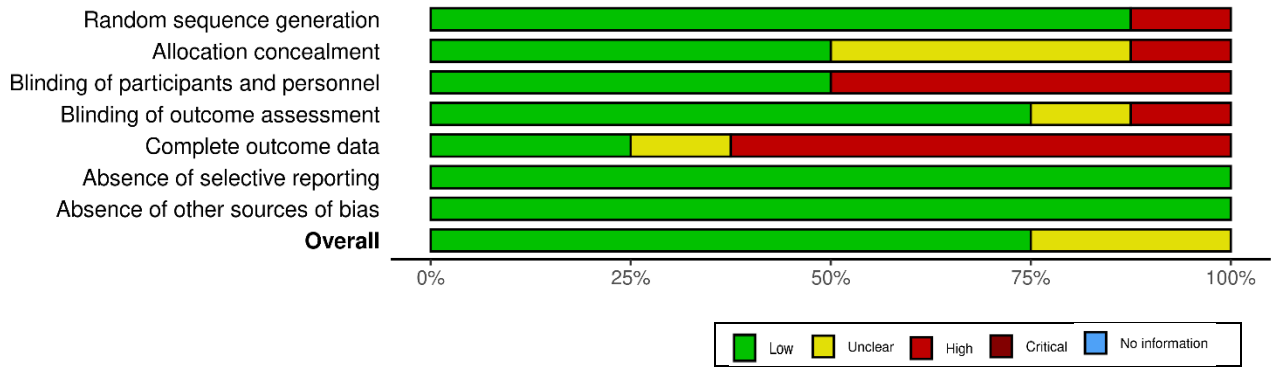

| Study                   | Risk of bias |    |    |    |    |    |    | Overall |
|-------------------------|--------------|----|----|----|----|----|----|---------|
|                         | D1           | D2 | D3 | D4 | D5 | D6 | D7 |         |
| Frazzitta et al. 2014   | +            | +  | X  | +  | X  | +  | +  | +       |
| Freidle et al. 2022     | +            | +  | +  | +  | +  | +  | +  | +       |
| Landers et al. 2019     | +            | +  | +  | +  | X  | +  | +  | +       |
| O'Callaghan et al. 2019 | +            | +  | X  | +  | X  | +  | +  | +       |
| Sajatovic et al. 2017   | +            | -  | +  | +  | X  | +  | +  | +       |
| Segura et al. 2020      | X            | -  | +  | +  | +  | +  | +  | +       |
| Soke et al. 2021        | +            | X  | X  | X  | X  | +  | +  | -       |
| Szymura et al. 2020     | +            | -  | X  | -  | -  | +  | +  | -       |

D1: Random sequence generation  
 D2: Allocation concealment  
 D3: Blinding of participants and personnel  
 D4: Blinding of outcome assessment  
 D5: Complete outcome data  
 D6: Absence of selective reporting  
 D7: Absence of other sources of bias

Judgement  
 X High  
 - Unclear  
 + Low

**Supplementary File 9. Risk Of Bias In Non-randomized Studies-of Interventions (ROBINS-I)**

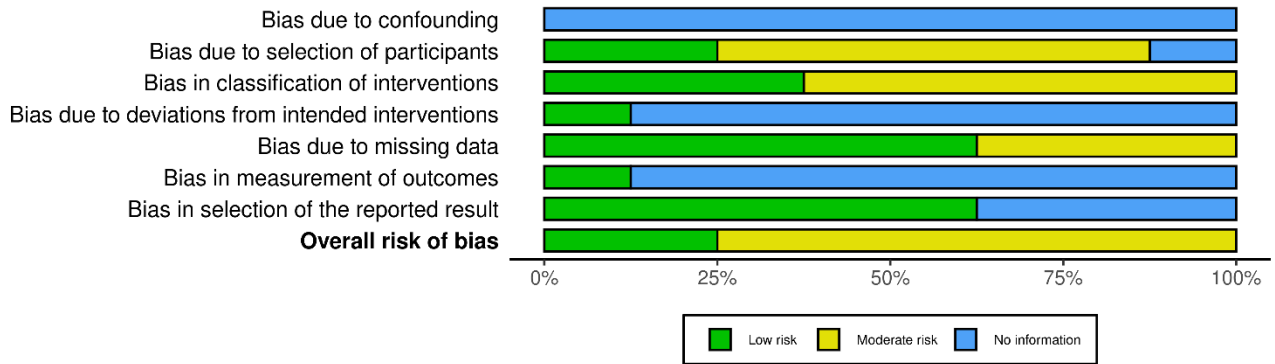

| Study                         | Risk of bias domains |    |    |    |    |    |    | Overall |
|-------------------------------|----------------------|----|----|----|----|----|----|---------|
|                               | D1                   | D2 | D3 | D4 | D5 | D6 | D7 |         |
| Angelucci et al. 2016         | ?                    | ?  | +  | +  | +  | ?  | ?  | -       |
| da Silva Germanos et al. 2019 | ?                    | +  | +  | ?  | +  | ?  | ?  | -       |
| De Oliveira et al. 2020       | ?                    | -  | -  | ?  | -  | +  | +  | +       |
| Harro et al. 2022             | ?                    | -  | -  | ?  | +  | ?  | +  | -       |
| Pondé et al. 2019             | ?                    | -  | -  | ?  | -  | ?  | ?  | -       |
| Schaeffer et al. 2022         | ?                    | -  | -  | ?  | +  | ?  | +  | +       |
| Stuckenschneider et al. 2021  | ?                    | -  | -  | ?  | -  | ?  | +  | -       |
| Zoladz et al. 2014            | ?                    | +  | +  | ?  | +  | ?  | +  | -       |

Domains:  
D1: Bias due to confounding.  
D2: Bias due to selection of participants.  
D3: Bias in classification of interventions.  
D4: Bias due to deviations from intended interventions.  
D5: Bias due to missing data.  
D6: Bias in measurement of outcomes.  
D7: Bias in selection of the reported result.

Judgement  
- Moderate  
+ Low  
? No information
